# Supplementary material
Source: publisher site journal article supplement (https://www.dovepress.com/article/372246)
Supplement: Supplementary file 1 [file get_supplementary_file.php]

Table S1. The definitions of AKI stages

| Functional criteria | Damage criteria | Stage |
| --- | --- | --- |
| No change or Cr level increase <0.3 mg/dL and no UO criteria | Cystatin C positive | 1S |
| Increase of Cr level by ≥0.3 mg/dL for ≤48 h or ≥150% for ≤7 days and/or UO <0.5 mL/kg/h for >6 h | Cystatin C negative | 1A |
| Cystatin C positive | 1B |
| Increase of Cr level by >200% and/or UO <0.5 mL/kg/h for >12 h | Cystatin C negative | 2A |
| Cystatin C positive | 2B |
| Increase of Cr level by >300% (≥4.0 mg/dL with an acute increase of ≥0.5 mg/dL) and/or UO <0.3 mL/kg/h for >24 h or anuria for >12 h and/or acute KRT | Cystatin C negative | 3A |
| Cystatin C positive | 3B |

Creatinine, Cr; Urine output, UO; kidney replacement therapy, KRT.

Table S2. ROC curve analyses of Cystatin C and Cr in the training cohort

| Variables | AUC | Sensitivity (%) | Specificity (%) | Youden index | Critical value | *P-*value |
| --- | --- | --- | --- | --- | --- | --- |
| Cystatin C | 0.807(0.772-0.842) | 75.3 | 99.2 | 0.745 | 1.035 | <0.001 |
| Cr | 0.765(0.631-0.799) | 59.2 | 99.7 | 0.589 | 111.5 | <0.001 |

Cr: creatinine.
